# Supplementary material
Source: PubMed Central journal article supplement (PMC4772731)
Supplement: NIHMS761096-supplement-01.pdf [file NIHMS761096-supplement-01.pdf]

## Supplemental Table 1

### Cost comparison for spheroid assays.

| Dye/Kit                                        | Manufacturer (catalog #)         | # of assays/kit   | Price/kit in US \$ | US \$/1000 assays | Recommended use/well                                                                         | Ref.       |
|------------------------------------------------|----------------------------------|-------------------|--------------------|-------------------|----------------------------------------------------------------------------------------------|------------|
| Acridine Orange                                | Thermo Fisher Scientific (A3568) | $1 \times 10^7$   | 70                 | <b>0.007</b>      | 0.01 $\mu\text{g}$                                                                           | This study |
| AQUEOUS MTS Reagent                            | Promega (G1111)                  | $2.5 \times 10^4$ | 922                | <b>36.88</b>      | 20 $\mu\text{l}$ MTS (3.9 mM)                                                                | [1]        |
| LIVE/DEAD viability/cytotoxicity kit           | Thermo Fisher Scientific (L3224) | 8000 – 10,000     | 400                | <b>40 – 50</b>    | 5 $\mu\text{l}$ Calcein AM (8 $\mu\text{M}$ ) and 5 $\mu\text{l}$ EthD-1 (16 $\mu\text{M}$ ) | [2]        |
| WST-1 reagent                                  | Roche (11644807001)              | 2500              | 468                | <b>187.2</b>      | 10 $\mu\text{l}$                                                                             | This study |
| CellTiter-Glo Luminescent Cell viability assay | Promega (G9683)                  | 1000              | 418                | <b>418</b>        | 100 $\mu\text{l}$                                                                            | [3]        |
| Cultrex 3D Spheroid Fluorometric Assay         | Trevigen (3510-096-K)            | 250               | 295                | <b>1180</b>       | 10 $\mu\text{l}$                                                                             |            |

1. **Hoffmann, O.I., C. Ilmberger, S. Magosch, M. Joka, K.W. Jauch, and B. Mayer.** 2015. Impact of the spheroid model complexity on drug response. *J Biotechnol* 205:14-23.
2. **Hsiao, A.Y., Y.C. Tung, X. Qu, L.R. Patel, K.J. Pienta, and S. Takayama.** 2012. 384 hanging drop arrays give excellent Z-factors and allow versatile formation of co-culture spheroids. *Biotechnol Bioeng* 109:1293-1304.
3. **Vinci, M., S. Gowan, F. Boxall, L. Patterson, M. Zimmermann, W. Court, C. Lomas, M. Mendiola, et al.** 2012. Advances in establishment and analysis of three-dimensional tumor spheroid-based functional assays for target validation and drug evaluation. *BMC Biol* 10:29.

# Preparation and Analysis of Acridine Orange Stained Neurospheres

PROTOCOL FOR:

**A Simple, Low-Cost Staining Method for Rapid-Throughput Analysis of Tumor Spheroids**

**Frank Eckerdt<sup>1, \*</sup>, Angel Alvarez<sup>2</sup>, Jonathan Bell<sup>1</sup>, Constadina Arvanitis<sup>3</sup>, Asneha Iqbal<sup>1, 4</sup>, Ahmet D. Arslan<sup>1</sup>, Bo Hu<sup>2</sup>, Shi-Yuan Cheng<sup>2</sup>, Stewart Goldman<sup>1, 4</sup>, and Leonidas C. Platanias<sup>1,5</sup>**

<sup>1</sup>*Robert H. Lurie Comprehensive Cancer Center and Division of Hematology- Oncology, Northwestern University Feinberg School of Medicine, Chicago, IL, USA*

<sup>2</sup>*Department of Neurology, Robert H. Lurie Comprehensive Cancer Center, Northwestern Brain Tumor Institute, Northwestern University Feinberg School of Medicine, Chicago, IL USA*

<sup>3</sup>*Center for Advanced Microscopy and Department of Pathology, Northwestern University Feinberg School of Medicine, Chicago, IL USA*

<sup>4</sup>*Division of Hematology and Oncology, Ann & Robert H. Lurie Children's Hospital of Chicago, Chicago, IL USA*

<sup>5</sup>*Department of Medicine, Jesse Brown VA Medical Center, Chicago, IL, USA*

*\* Address correspondence to: Frank Eckerdt, Robert H. Lurie Comprehensive Cancer Center, Northwestern University Feinberg School of Medicine, 303 East Superior Street, Lurie 3-220, Chicago, IL 60611, Email: frank.eckerdt@northwestern.edu*

*BioTechniques Vol#:pp-pp (Month Year)*

## LEGEND

 **ATTENTION**

 **HINT**

 **REST**

## REAGENTS

DMEM/F12 (Thermo Fisher Scientific, Grand Islands, NY catalog # 10565-018)  
B27 Supplement (Thermo Fisher Scientific, Grand Islands, NY catalog # 17504-044)  
Heparin (Sigma-Aldrich, St. Louis, MD catalog # H3149)  
EGF (20 ng/ml, Peprotech, Rocky Hill, NJ catalog # AF-100-15)  
basic FGF (20 ng/ml, Peprotech, Rocky Hill, NJ catalog # 100-18B)  
TrypLE Express (Thermo Fisher Scientific, Grand Island, NY catalog # 12604-013)  
Acridine Orange (Thermo Fisher Scientific, Grand Island, NY catalog #A3568)

## PROCEDURE

### GENERATION AND SEEDING OF NEUROSPHERE CELLS:

1. Trypsinize adherent growing U87 cells, collect in PBS and centrifuge at 1000 rpm for 5 min.
2. Resuspend in PBS and count cells.
3. Seed 4,000,000 cells into 75 cm<sup>2</sup> low adhesion flask, (Greiner bio-one, cat. # 658195) in 12 ml cancer stem cell medium (CSC medium).
4. Allow neurosphere formation for > 4 days, replace medium every other day. Resulting neurospheres can be cultured for up to eight passages.
5. Prepare round bottom 96-well plates (96 Well Suspension Culture Plate from Greiner bio-one, cat #650185) with 50 µl CSC medium per well.
6. Dissociate U87 neurospheres with TrypLE Express into single cells, centrifuge at 1000 rpm for 5 min and resuspend in 1 ml PBS.
7. Subject cells to flow cytometry using a BD FACSAria2 Special Order Research Product (SORP) instrument (San Jose, CA) in a biosafety cabinet and sort cells by forward-scattered light (FSC) vs. side-scattered light (SSC). Seed 1000 cells/well into the round bottom 96-well plates prepared in step 5.
8. Add 50 µl of CSC medium with or without 2X inhibitors, resulting in a total volume of 100 µl CSC medium per well.
9. Incubate at 37°C in a CO<sub>2</sub> incubator for 14 days.

\* This protocol is not limited to U87 cells and can be used for most adherent growing cell lines (composition of CSC medium might need to be adjusted for non-neuronal cell lines). In case of highly “sticky” cells, Ultra Low Attachment 96-well round bottom plates (Corning, cat. #7007) can be used to facilitate sphere formation. Also, other Cell Sorting Instruments can be used for sorting cells.

### ACRIDINE ORANGE STAINING OF NEUROSPHERES:

10. To each well add 1 µl of Acridine Orange (10 µg/ml) for 1 hour at 37°C in a CO<sub>2</sub> incubator.

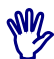

Cells can remain with acridine orange overnight at 37°C in a CO<sub>2</sub> incubator for analysis on the next day.

### IMAGING AND ANALYSIS OF NEUROSPHERES

11. If using NIS-Elements software and a 10x air PlanApo objective, Image Acquisition is set to “Capture Large Images Setting” using the 3 x 3 tile function (resulting image size is 2282.35 x 2282.35 µm).
12. General Analysis Parameters include:  
Threshold:  $\geq 300$ . (Threshold should be adjusted according to the fluorescence intensity of the cell line.) Size:  $\geq 100$ , Circularity:  $\geq 0.12$
13. Using these settings, image capture and data collection will require 5 minutes, 18 seconds.

### RECIPES

#### Cancer Stem Cell (CSC) medium (511.3 ml)

| Component             | Vulume (ml) | [final]   |
|-----------------------|-------------|-----------|
| DMEM/F12              | 500 ml      | 1 x       |
| B27 Supplement (50x)  | 10 ml       | 1 x       |
| Heparin (25 mg/ml)    | 100 µl      | 5 µg/ml   |
| EGF (0.1 mg/ml)       | 100 µl      | 20 ng/ml  |
| bFGF (0.1 mg/ml)      | 100 µl      | 20 ng/ml  |
| Gentamicin (50 mg/ml) | 1 ml        | 0.1 mg/ml |

\* Stock solution for EGF is prepared in ddH<sub>2</sub>O with 1 % BSA, for bFGF in 5 mM Tris pH 7.6, 0.1%BSA. Instead of Gentamicin, Pen Strep (1%, Thermo Fisher Scientific, Grand Islands, NY) can be used.
